# Supplementary material for: Sources of non-fossil-fuel emissions in carbonaceous aerosols during early winter in Chinese cities
Source: Copernicus journal article supplement (doi:10.5194/acp-17-11491-2017), 2017-09-27
Supplement: Supplementary file 1 [file acp-17-11491-2017-supplement.pdf]

Supplement of Atmos. Chem. Phys., 17, 11491–11502, 2017  
<https://doi.org/10.5194/acp-17-11491-2017-supplement>  
© Author(s) 2017. This work is distributed under  
the Creative Commons Attribution 3.0 License.

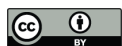

*Supplement of*

## **Sources of non-fossil-fuel emissions in carbonaceous aerosols during early winter in Chinese cities**

**D. Liu et al.**

*Correspondence to:* Jun Li (junli@gig.ac.cn)

The copyright of individual parts of the supplement might differ from the CC BY 3.0 License.

### Details of sampling information

| city      | Abbreviation | location site                                         | Coordinates     |                                     |
|-----------|--------------|-------------------------------------------------------|-----------------|-------------------------------------|
| Beijing   | BG           | National research center for<br>geoanalysis           | 116.34E, 39.93N | 2013/11/3(Low)<br>2013/11/5(high)   |
| Shanghai  | SH           | Handan Campus of Fudan<br>University                  | 31.29N, 121.5E  | 2013/11/6(low)<br>2013/11/7 (high)  |
| Guangzhou | GZ           | Institute of Geochemistry,<br>CAS                     | 23.15N,113.36E  | 2013/10/28(low)<br>2013/10/29(high) |
| Nanjing   | NJ           | Institute of Soil Science,<br>CAS                     | 32.06N, 118.8E  | 2013/10/27(Low)<br>2013/10/29(high) |
| Chengdu   | CD           | Institute of mountain hazards<br>and environment, CAS | 30.64N, 104.08E | 2013/10/31(low)<br>2013/11/8(h)     |
| Taiyuan   | TY           | China institute for radiation                         | 37.80N, 112.57E | 2013/10/25(low)                     |

|          |    |                                   |                 |                                     |
|----------|----|-----------------------------------|-----------------|-------------------------------------|
|          |    | protection                        |                 | 2013/10/26(high)                    |
| Wuhan    | WH | Wuhan University                  | 30.53N,114.37E  | 2013/10/26(low)<br>2013/10/30(high) |
| Xinxiang | XX | Henan normal university           | 35.33N, 113.91E | 2013/10/15<br>2013/10/22            |
| Lanzhou  | LZ | Lanzhou university                | 36.05N, 103.86E | 2013/10/20<br>2013/10/21            |
| Guiyang  | GY | Institute of Geochemistry,<br>CAS | 26.57N, 106.73E | 2013/10/31<br>2013/11/6             |

Figure S1. Filter selection

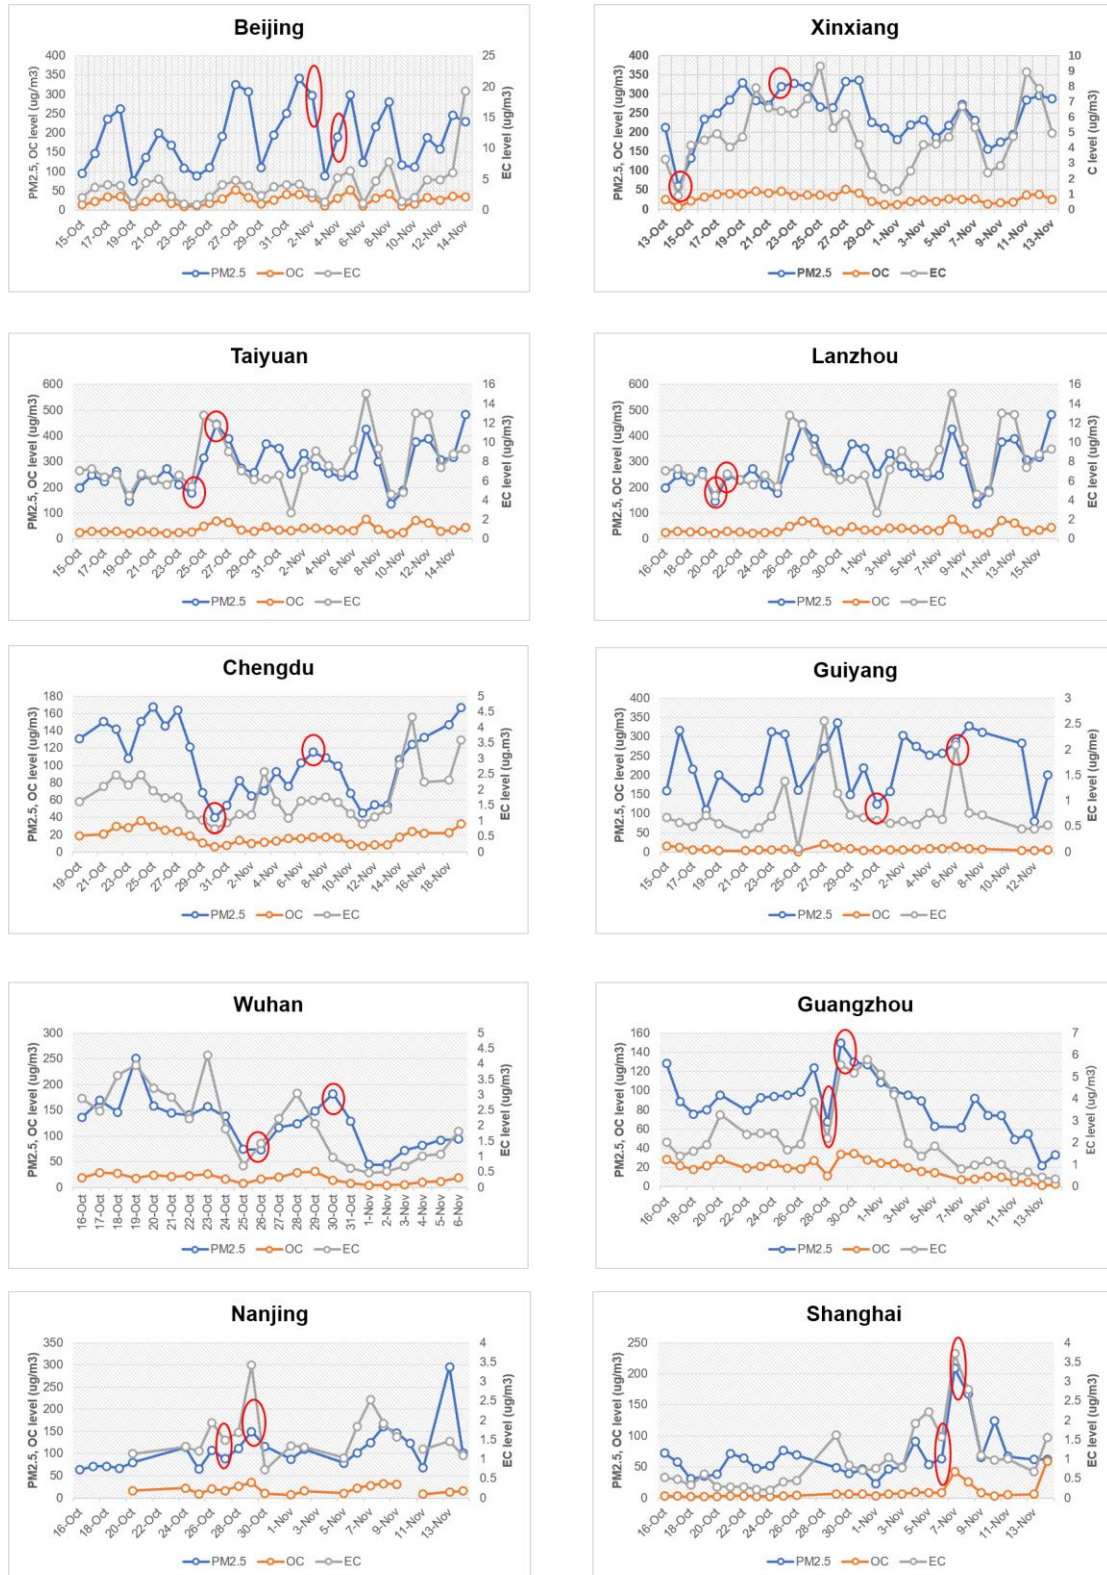

### **WINSOC and EC measurement**

One punch (area: 1.5 cm<sup>2</sup>) cut from each filter for analysis of WINSOC and EC mass concentration using the thermal-optical transmittance (TOT) method (NIOSH 870) by an OC/EC analyzer (Sunset Laboratory Inc., Tigard, OR, U.S.). For quality control, the analyzer was calibrated routinely using prebaked filter blank and standard sucrose solutions every day. The replicate analysis was performed with 10% of total samples and differences were within 10% for WINSOC and EC. Ten field blanks for each site were collected as the same way as other samples except with small exposure time of 15 min. The average concentrations of WINSOC on the field blanks at each site were less than 1% of the sample batches, and EC blank was undetectable. All reported WINSOC concentrations were not subtracted from the samples.

### **Water-soluble ion and anhydrosugars analysis**

In brief, one punch (1 inch in diameter) was extracted in ultrapure water, sonicated in an ice-water bath, filtered through a 0.22 µm size filter and then main water-soluble cations (Na<sup>+</sup>, K<sup>+</sup>, NH<sub>4</sub><sup>+</sup>, Ca<sup>2+</sup>, Mg<sup>2+</sup>) and anions (Cl<sup>-</sup>, SO<sub>4</sub><sup>2-</sup> and NO<sub>3</sub><sup>-</sup>) were determined simultaneously by using ion chromatograph (Shimadzu TOC\_VCPH, Japan). All ions were quantified against a standard calibration curve. Based on daily test samples, the uncertainty of the ion compound analyses of the filters is within 10% for all the analyzed ions. For the analysis of anhydrosugars (levoglucosan, Galactosan and Mannosan isomers), one punch of filter (1cm in diameter) was used. Internal recovery standards (methyl-β-L-xylanopyranoside, m-XP) were added to the filter and extracted with methanol three times for 15 min using ice-water ultrasonic agitation. Afterwards the extract was reduced to 1 mL with a rotary evaporator, filtered and dried completely by a gentle nitrogen stream, and then added with a mixture of 40 µL of N,O-Bis(trimethylsilyl)trifluoroacetamide (BSTFA) plus 1% trimethylsilyl chloride and pyridine in an oven of 70°C for 1 h before running on gas chromatography (GC)-MSD (Agilent 7890 GC and Agilent 5975 MS) with a capillary column (DB-5MS, 30 m, 0.25 mm, 0.25 µm).
